# Supplementary material for: Transcriptome Analysis of Early Surface-Associated Growth of Shewanella oneidensis MR-1
Source: PLOS journal article supplement (doi:10.1371/journal.pone.0042160), 2012-07-31
Supplement: S2 (10.1371/journal.pone.0042160.s002) [file journal.pone.0042160.s002]

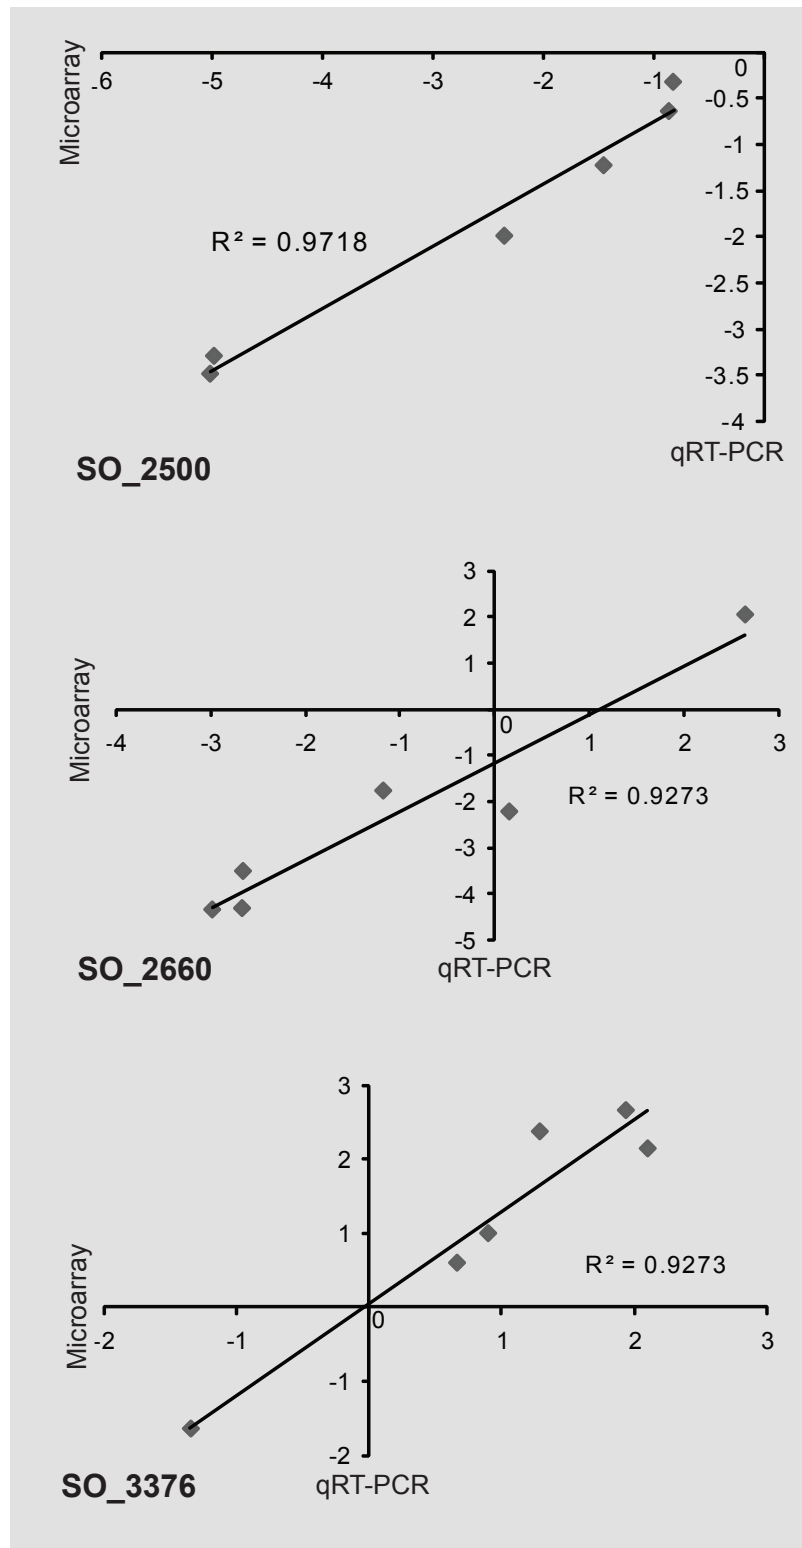

**Figure S2: Validation of the transcriptome data by q-RT-PCR analyses.** The diagrams are representing the log2-fold changes of the gene expression of SO\_2500, SO\_2660 and SO\_3376 in surface-associated cells under hydrodynamic conditions (harvested after 0.25, 1, 2 and 4 hours) compared to planktonic culture. Plotted on the x-axis are the data values of the microarray analyses, on the y-axis the data values of the q-RT-PCR are shown. The coefficient of determination  $R^2$  represents the statistical variance of the transcriptome data.
