# Supplementary material for: Transcriptome Analysis of Early Surface-Associated Growth of Shewanella oneidensis MR-1
Source: PLOS journal article supplement (doi:10.1371/journal.pone.0042160), 2012-07-31
Supplement: S6 (10.1371/journal.pone.0042160.s006) [file journal.pone.0042160.s006]

**Table S4:** Differentially regulated genes related to “metabolic adaptation” - Carbohydrate transport and metabolism

| Locus   | Gene          | Product                                                             | log <sub>2</sub> ratio |
|---------|---------------|---------------------------------------------------------------------|------------------------|
| SO_0345 | <i>prpB</i>   | 2-methylisocitrate lyase                                            | -1.58                  |
| SO_0525 | -             | drug resistance transporter, EmrB/QacA family protein               | -1.54                  |
| SO_0538 | <i>gapA-1</i> | glyceraldehyde-3-phosphate dehydrogenase                            | -1.43                  |
| SO_1505 | -             | transporter, putative                                               | 1.46                   |
| SO_1917 | -             | multidrug resistance protein, putative                              | -1.44                  |
| SO_2156 | -             | alpha amylase family protein                                        | -1.27                  |
| SO_2347 | <i>gapA-3</i> | glyceraldehyde-3-phosphate dehydrogenase                            | -2.88                  |
| SO_2389 | <i>emrD</i>   | multidrug resistance protein D                                      | -1.77                  |
| SO_2486 | <i>eda</i>    | keto-hydroxyglutarate-aldolase/keto-deoxy-phosphogluconate aldolase | 2.23                   |
| SO_2488 | <i>pgl</i>    | 6-phosphogluconolactonase                                           | 2.34                   |
| SO_2489 | <i>zwf</i>    | glucose-6-phosphate 1-dehydrogenase                                 | 2.01                   |
| SO_2491 | <i>pykA</i>   | pyruvate kinase II                                                  | 2.23                   |
| SO_2644 | <i>ppsA</i>   | phosphoenolpyruvate synthase                                        | -1.15                  |
| SO_2970 | -             | hypothetical protein                                                | 1.81                   |
| SO_3547 | <i>pgi</i>    | glucose-6-phosphate isomerase                                       | 1.67                   |
| SO_3714 | -             | sugar-binding protein, putative                                     | -1.05                  |
| SO_4040 | -             | integral membrane domain-containing protein                         | -1.55                  |
