# Supplementary material for: Transcriptome Analysis of Early Surface-Associated Growth of Shewanella oneidensis MR-1
Source: PLOS journal article supplement (doi:10.1371/journal.pone.0042160), 2012-07-31
Supplement: S7 (10.1371/journal.pone.0042160.s007) [file journal.pone.0042160.s007]

**Table S5:** Differentially regulated genes related to “metabolic adaptation” - Lipid transport and metabolism

| Locus   | Gene          | Product                                                          | log <sub>2</sub> ratio |
|---------|---------------|------------------------------------------------------------------|------------------------|
| SO_0020 | <i>fadA</i>   | 3-ketoacyl-CoA thiolase                                          | -1.83                  |
| SO_0021 | <i>fadB</i>   | multifunctional fatty acid oxidation complex subunit alpha       | -1.73                  |
| SO_0355 | -             | AMP-binding protein                                              | 1.64                   |
| SO_0496 | -             | hypothetical protein                                             | 1.31                   |
| SO_0572 | -             | enoyl-CoA hydratase                                              | -1.02                  |
| SO_1677 | <i>atoB</i>   | acetyl-CoA acetyltransferase                                     | -2.05                  |
| SO_1679 | -             | acyl-CoA dehydrogenase family protein                            | -2.31                  |
| SO_1680 | -             | enoyl-CoA hydratase                                              | -2.30                  |
| SO_1681 | -             | enoyl-CoA hydratase/isomerase family protein                     | -1.78                  |
| SO_1891 | -             | 3-oxoadipate CoA-succinyl transferase, beta subunit              | -1.12                  |
| SO_1892 | <i>atoD</i>   | acetate CoA-transferase, subunit A                               | -1.78                  |
| SO_1894 | -             | acetyl-CoA carboxylase, biotin carboxylase, putative             | -1.80                  |
| SO_1895 | -             | enoyl-CoA hydratase/isomerase family protein                     | -1.14                  |
| SO_1896 | <i>pccB-1</i> | 3-methylcrotonyl CoA carboxylase, beta subunit                   | -1.68                  |
| SO_1897 | <i>ivd</i>    | isovaleryl-CoA dehydrogenase                                     | -2.16                  |
| SO_2395 | -             | acyl-CoA dehydrogenase family protein                            | -1.73                  |
| SO_2492 | -             | acyl-CoA dehydrogenase                                           | -1.18                  |
| SO_2536 | <i>fadE</i>   | acyl-CoA dehydrogenase                                           | -3.42                  |
| SO_2743 | <i>acs</i>    | acetyl-CoA synthetase                                            | -2.22                  |
| SO_2768 | -             | acyl-CoA dehydrogenase family protein                            | -1.00                  |
| SO_2772 | -             | cytosolic long-chain acyl-CoA thioester hydrolase family protein | 1.02                   |
| SO_3088 | <i>fadJ</i>   | multifunctional fatty acid oxidation complex subunit alpha       | -1.41                  |
| SO_3089 | <i>fadI</i>   | 3-ketoacyl-CoA thiolase                                          | -2.25                  |
| SO_3263 | -             | 3-oxoacyl-(acyl-carrier-protein) reductase, putative             | 1.08                   |
| SO_3265 | -             | hypothetical protein                                             | 1.61                   |
